# Supplementary material
Source: publisher figshare collection journal article supplement (https://acs.figshare.com/ndownloader/files/4695061)
Supplement: Supplementary file 1 [file 4695061]

# Synthesis of normal and inverted core-shell architectures of gold /silver in $\beta$ -cyclodextrin and their applications in SERS

Surojit Pande, Sujit Kumar Ghosh, Snigdhamayee Praharaj, Sudipa Panigrahi, Soumen Basu, Subhra Jana, Anjali Pal<sup>§</sup>, Tatsuya Tsukuda<sup>†</sup> and Tarasankar Pal\*

## Supporting Information

**SI 1.** EDS spectra of Ag<sub>core</sub>-Au<sub>shell</sub> bimetallic nanoparticles.

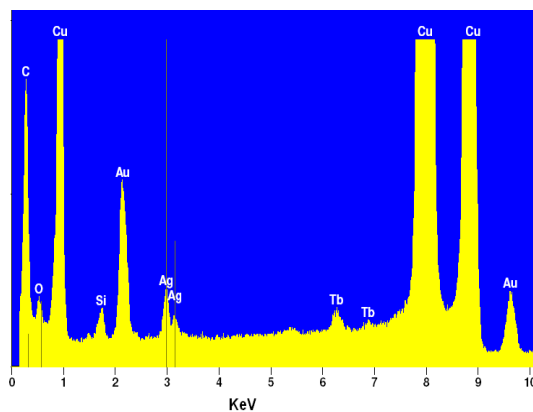

**SI 1.**

**SI 2.** HRTEM image of the Ag<sub>core</sub>-Au<sub>shell</sub> bimetallic nanoparticles (a) before and (b) after prolonged (~ 10 min) electron beam irradiation.

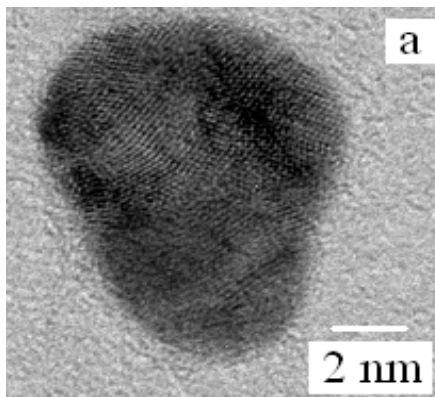

**SI 2a.**

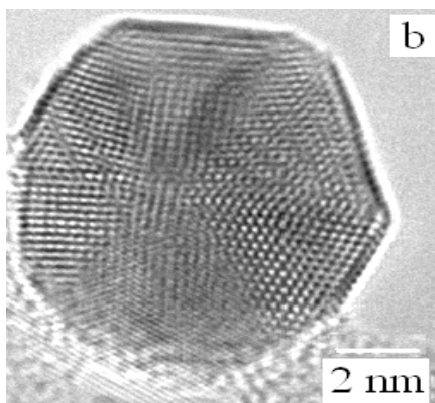

**SI 2b.**
